# Supplementary material
Source: PubMed Central journal article supplement (PMC4667380)
Supplement: aasm.38.12.1905s1.pdf [file aasm.38.12.1905s1.pdf]

**Table S1.** Indirect effect of mediators on the sleep duration–metabolic syndrome and number of metabolic syndrome components relationship for women

| Mediators                    | c-c'   |                                 |                                 |
|------------------------------|--------|---------------------------------|---------------------------------|
|                              | MetS   | MetS                            | Number of MetS Components       |
| C-reactive protein (nM)      | -0.039 | -0.044 (-0.097, 0.010)          | -0.043 (-0.093, 0.006)          |
| γ-Glutamyl transferase (U/L) | -0.035 | -0.048 (-0.142, 0.045)          | -0.017 (-0.049, 0.014)          |
| Bilirubin (μM)               | -0.007 | -0.008 (-0.026, 0.011)          | -0.012 (-0.032, 0.008)          |
| Carotenoids (μM)             | -0.054 | <b>-0.078 (-0.133, -0.022)*</b> | <b>-0.055 (-0.093, -0.017)*</b> |
| Uric acid (μM)               | -0.037 | -0.065 (-0.146, 0.016)          | -0.050 (-0.111, 0.012)          |
| Vitamin A (μM)               | 0.019  | 0.010 (-0.023, 0.043)           | 0.009 (-0.019, 0.036)           |
| Vitamin C (μM)               | -0.040 | <b>-0.043 (-0.081, -0.005)*</b> | <b>-0.030 (-0.059, 0.000)*</b>  |
| Vitamin D (nM)               | -0.090 | <b>-0.104 (-0.170, -0.037)*</b> | <b>-0.082 (-0.128, -0.035)*</b> |
| Vitamin E (μM)               | 0.032  | 0.011 (-0.045, 0.067)           | 0.009 (-0.038, 0.056)           |

Asterisk indicates significant for Joint test, bold values indicate significant for Sobel test. c-c' and ab = indirect mediation effects; CI = confidence interval; MetS = metabolic syndrome.

**Table S2.** Indirect effect of mediators on the sleep duration–individual metabolic syndrome component relationship for women

| Mediators                    | ab (95% CI <sub>Sobel</sub> )             |                                           |                                           |                                           |                                           |                                        |
|------------------------------|-------------------------------------------|-------------------------------------------|-------------------------------------------|-------------------------------------------|-------------------------------------------|----------------------------------------|
|                              | Waist circumference                       | Systolic blood pressure                   | Diastolic blood pressure                  | Triglycerides                             | Fasting plasma glucose                    | HDL cholesterol                        |
| C-reactive Protein (nM)      | -0.628<br>(-1.347, 0.092)                 | -0.221<br>(-0.521, 0.079)                 | -0.104<br>(-0.263, 0.055)                 | -0.024<br>(-0.052, 0.004)                 | <b>-0.044</b><br><b>(-0.086, -0.001)*</b> | 0.006<br>(-0.002, 0.014)               |
| γ-Glutamyl transferase (U/L) | -0.139<br>(-0.408, 0.129)                 | -0.170<br>(-0.515, 0.175)                 | -0.025<br>(-0.08, 0.031)                  | -0.012<br>(-0.035, 0.012)                 | -0.022<br>(-0.054, 0.010)                 | 0.000<br>(-0.002, 0.002)               |
| Bilirubin (μM)               | -0.120<br>(-0.349, 0.110)                 | 0.002<br>(-0.141, 0.146)                  | -0.044<br>(-0.129, 0.041)                 | -0.010<br>(-0.025, 0.005)                 | 0.004<br>(-0.014, 0.023)                  | 0.005<br>(-0.002, 0.012)               |
| Carotenoids (μM)             | <b>-0.672</b><br><b>(-1.135, -0.210)*</b> | -0.268<br>(-0.562, 0.025)*                | 0.004<br>(-0.088, 0.096)                  | <b>-0.018</b><br><b>(-0.032, -0.005)*</b> | <b>-0.037</b><br><b>(-0.065, -0.009)*</b> | <b>0.014</b><br><b>(0.004, 0.025)</b>  |
| Uric acid (μM)               | -0.544<br>(-1.218, 0.131)                 | -0.382<br>(-0.871, 0.106)                 | 0.020<br>(-0.042, 0.083)                  | -0.019<br>(-0.043, 0.005)                 | -0.013<br>(-0.037, 0.012)                 | 0.004<br>(-0.001, 0.008)*              |
| Vitamin A (μM)               | 0.031<br>(-0.073, 0.134)                  | 0.086<br>(-0.206, 0.378)                  | -0.008<br>(-0.066, 0.05)                  | 0.009<br>(-0.020, 0.037)                  | 0.001<br>(-0.011, 0.013)                  | 0.001<br>(-0.003, 0.006)               |
| Vitamin C (μM)               | <b>-0.586</b><br><b>(-1.046, -0.125)*</b> | 0.005<br>(-0.291, 0.302)                  | <b>-0.164</b><br><b>(-0.325, -0.002)*</b> | <b>-0.022</b><br><b>(-0.041, -0.003)*</b> | -0.019<br>(-0.039, 0.002)                 | <b>0.011</b><br><b>(0.002, 0.019)*</b> |
| Vitamin D (nM)               | <b>-1.091</b><br><b>(-1.658, -0.525)</b>  | <b>-0.590</b><br><b>(-1.106, -0.073)*</b> | -0.055<br>(-0.183, 0.072)                 | -0.017<br>(-0.037, 0.004)                 | <b>-0.046</b><br><b>(-0.086, -0.006)*</b> | <b>0.012</b><br><b>(0.003, 0.021)</b>  |
| Vitamin E (μM)               | 0.047<br>(-0.193, 0.287)                  | 0.052<br>(-0.487, 0.591)                  | 0.005<br>(-0.064, 0.074)                  | 0.014<br>(-0.059, 0.087)                  | 0.023<br>(-0.025, 0.072)                  | 0.000<br>(-0.002, 0.003)               |

Asterisk indicates significant for Joint test, bold values indicate significant for Sobel test.

ab = indirect effect; CI = confidence interval; HDL = high-density lipoprotein; MetS = metabolic syndrome.
